# Supplementary material
Source: PubMed Central journal article supplement (PMC7611339)
Supplement: EMS94771-supplement-Supplementary_Material.pdf [file EMS94771-supplement-Supplementary_Material.pdf]

## Supplementary Methods

To generate the *p22Iz-Cas9p-t35s* entry vector, first, *Cas9p* with two flanking nuclear localized signal (*NLS*) coding sequence and a *t35* terminator were amplified from vector

*pYLCRISRPCas9P35S-B<sup>1</sup>* with chimeric primers which contained the *attB1/attB2* adaptor at the 5' end and a 3' end complementary to *NLS* and *t35s*, respectively. The resultant PCR fragment was gel-purified and then recombined with *pDONR 221* following the instructions of the Gateway BP Clonase II Enzyme mix (Invitrogen).

Site-directed mutations were introduced to two nuclease domains of *Cas9p*, RuvC1 and HNH (D10A, H840A)<sup>2</sup>, respectively, to generate d*Cas9*. To achieve this, a partial *Cas9p* fragment (61-2582, starting from ATG) was amplified with primers containing the desired mutations. The purified PCR fragment was then used as a mega-primer to amplify *p22Iz-Cas9p-t35s*. The resulting PCR product was digested by methylation-specific endonuclease Dpn I to remove the parental DNA template before transformation into competent *E.coli* DH5 $\alpha$  cells. The presence of mutations in *p22Iz-dCas9p-t35s* was verified by Sanger sequencing.

To insert the *tagRFP* sequence between *Cas9p* and the 3' end of the *NLS* encoding sequence located in *p22Iz-Cas9p-t35s*, *tagRFP* was first amplified from the entry vector *p2R3a-tagRFP-OcsT<sup>3</sup>* with chimeric primers consisting of a 3' end of *tagRFP*-specific oligonucleotides and a 5' end of *Cas9p/NLS*-specific oligonucleotides complementary to the flanking sequence at the insertion point. The purified PCR fragment was then used as mega-primer in the subsequent Omega PCR step<sup>4</sup>, which used *p22Iz-Cas9p-t35s* as the template. The PCR product was treated with Dpn I before transformation into competent *E.coli* DH5 $\alpha$  cells. The insertion of *tagRFP* was verified by both enzyme digestion and Sanger sequencing.

To facilitate ligation of the sgRNA expression cassette (*pAtU3/6-sgRNA*) into a Gateway entry vector, the negative selection marker, a *ccdB* expression cassette flanked by two *Bsa I* sites, was amplified from *pYLCRISRPCas9P35S-B<sup>1</sup>* with primers containing *attB2/attB3* adaptors. After a BP

reaction with *pDONR P2R-P3z*, the reaction mixture was transformed into the *ccdB*-tolerant *E.coli* strain DB3.1. Colony PCR was performed to screen for positive colonies which had been transformed with recombined plasmids but not the empty *pDONR-P2R-P3z*. The presence of the *p2R3z-Bsa I-ccdB-Bsa I* entry vector was then further confirmed by enzyme digestion and Sanger sequencing.

To generate the *p221z-AtMIR390a* entry vector (Fig. 1b), a BP reaction was performed with *pDONR 221* and *pMDC123SB-AtMIR390a-B/c*<sup>5</sup> (Addgene ID: 51775). *pMDC123SB-AtMIR390a-B/c* contains *AtMIR390a* 5' end and *AtMIR390a* 3' end which were split by *Bsa I*-flanking *ccdB* expression modules. After transforming DB3.1, positive colonies were screened by colony PCR followed by enzyme digestion and sequencing. Two artificial microRNA against *PLT2* (*amiPLT2-1* and *amiPLT2-2*) were designed using <http://p-sams.carringtonlab.org/>. Annealed *amiPLT2* was ligated into *p221z-AtMIR390a* by a one-step reaction as previously described<sup>5</sup>.

Tandem arrayed tRNA-sgRNA units have been exploited for multiplex genome editing by using the endogenous tRNA processing machinery<sup>6</sup>, which precisely cuts tRNA precursors at both ends and releases free sgRNA after transcription. This strategy has been applied in a variety of plant species<sup>6,7</sup>. However, to date there are few reports of its application in *Arabidopsis*. We therefore investigated its feasibility in *Arabidopsis* genome editing and meanwhile tested its compatibility with our IGE system. To facilitate target sequence ligation, we first constructed a *p2R3z-AtU3b-tRNA-ccdB-sgRNA* entry vector (Fig. 1b). *AtU3b*, tRNA-1, tRNA-2 (tRNA was amplified in two separate fragments), the *ccdB* expression cassette (flanked by *Bsa I*), and the sgRNA scaffold were amplified with the indicated primer pairs. Both ends of each fragment contained primer-introduced sequences overlapping with the desired flanking fragments. In the overlapping PCR step, *attB2-AtU3b-F* and *attB3-sgRNA-R* were used as a primer pair to assemble these five purified PCR fragments, which were mixed as templates. Cloning this fused fragment into *pDONR P2R-P3z* was conducted as described above. To clone the first target sequence of *PLT2* into *p2R3z-AtU3b-tRNA-*

*ccdB*-sgRNA, two annealed primers with 4-nucleotide overhangs at the 5' ends and 20-nucleotide complementary target sequences were ligated into the entry vector in a one-step reaction as described previously<sup>5</sup>. In the *Arabidopsis* RM, we observed a decrease of the YFP signal in the region where the inducible promoter was active in most independent lines after a 1-day induction and finally a fully differentiated RM after a 10-day induction (Extended Data Fig. 4 and Supplementary Table 1), indicating that sgRNA against *PLT2* was disassociated from tRNA processing and guiding Cas9p to cleave *PLT2*. It has recently been reported that efficient genome editing could be achieved by fusing tRNA to a mutant sgRNA scaffold but not the wild type sgRNA scaffold in *Arabidopsis*<sup>8</sup>. However, in our hands wild type sgRNA scaffold and tRNA fusion worked well. We reasoned that the sgRNA promoter, Cas9 variant, sgRNA scaffold, target loci, and the tissue to be edited may all affect tRNA-sgRNA-mediated editing performance in *Arabidopsis*. Therefore a future comprehensive study of these variables may improve the utility of the tRNA processing system in *Arabidopsis*.

The red seed coat vector *pFRm43GW* was generated by modifying the *pHm43GW* destination vector<sup>9</sup>, which was obtained from VIB (<https://gateway.psb.ugent.be/>). The *pHm43GW* vector was digested with PaeI (SphI) (ThermoFisher Scientific) to remove the hygromycin cassette. Using an In-Fusion HD Cloning (TaKaRa) kit, two fragments were cloned into the digested vector. The first fragment contained a *ccdB* cassette and recombination sites for MultiSite Gateway cloning, and it was amplified from *pHm43GW* using

GAACCCTGTGGTTGGCATGCACATACAAATGGACGAACGGATAAA as a forward primer and ATACCTACATACACTTGAAGGGTACCCGGGGATCCTCTAGAGGG as a reverse primer.

The second fragment contained the FastRed module, consisting of the *OLE1* promoter followed by *OLE1-tagRFP*, which was amplified from *pFAST-R01*<sup>10</sup> using CTTCAAGTGTATGTAGGTATAGTAACATG as a forward primer and

CGAATTGAATTATCAGCTTGCATGCAGGGTACCATCGTTCAAACATTTGGCAAT as a reverse primer.

We also provide another non-destructive fluorescent screening vector, the green seed coat vector *pFG7m34GW*. It was generated by cloning the FastGreen module into the *pP7m34GW* vector<sup>9</sup>, which was obtained from VIB (<https://gateway.psb.ugent.be/>). The *pP7m34GW* vector was digested with SacI (ThermoFisher Scientific). Three fragments were cloned into the digested *pP7m34GW*. The first fragment contained the *OLE1* promoter followed by the *OLE1* genomic sequence and was amplified from *pFRm43GW* using CCATATGGGAGAGCTCCTTCAAGTGTATGTAGGTATAGT as a forward primer and GCCCTTGCTCACCATAGTAGTGTGCTGGCCACCACGAG as a reverse primer; the second fragment contained the *EGFP* encoding sequence and was amplified from the *pBGWFS7* vector<sup>9</sup> using ATGGTGAGCAAGGGCGAGGAGCTGT as a forward primer and ATCTATGTTACTAGATCACTTGTACAGCTCGTCCATGCC as a reverse primer; the third fragment contained the *nosT* terminator sequence and was amplified from the *p1R4-ML:XVE* vector<sup>3</sup> using TCTAGTAACATAGATGACACCGCGCG as a forward primer and TTAACGCCGAATTGAATTCGAGCTCCATCGTTCAAACAT as a reverse primer. All three fragments were combined together with the digested vector using In-Fusion HD Cloning.

## Reference

1. Ma, X. *et al. Mol. Plant* **8**, 1274-1284 (2015).
2. Jinek, M. *et al. Science* **337**, 816-821 (2012).
3. Siligato, R. *et al. Plant Physiol.* **170**, 627-641 (2016).
4. Chen, L., Wang, F., Wang, X. & Liu, Y. G. *Plant Cell Physiol.* **54**, 634-642 (2013).
5. Carbonell, A. *et al. Plant Physiol.* **165**, 15-29 (2014).
6. Xie, K., Minkenberg, B. & Yang, Y. *Proc. Natl. Acad. Sci. USA* **112**, 3570-3575 (2015).
7. Jaganathan, D., Ramasamy, K., Sellamuthu, G., Jayabalan, S. & Venkataraman, G. *Front. Plant Sci.* **9**, 985 (2018).

8. Zhang, Q. *et al.* *Plant Mol. Biol.* **96**, 445-456 (2018).
9. Karimi, M., Inze, D. & Depicker, A. *Trends Plant Sci.* **7**, 193-195 (2002).
10. Shimada, T. L., Shimada, T. & Hara-Nishimura, I. *Plant J.* **61**, 519-528 (2010).

# Supplementary Figure 1

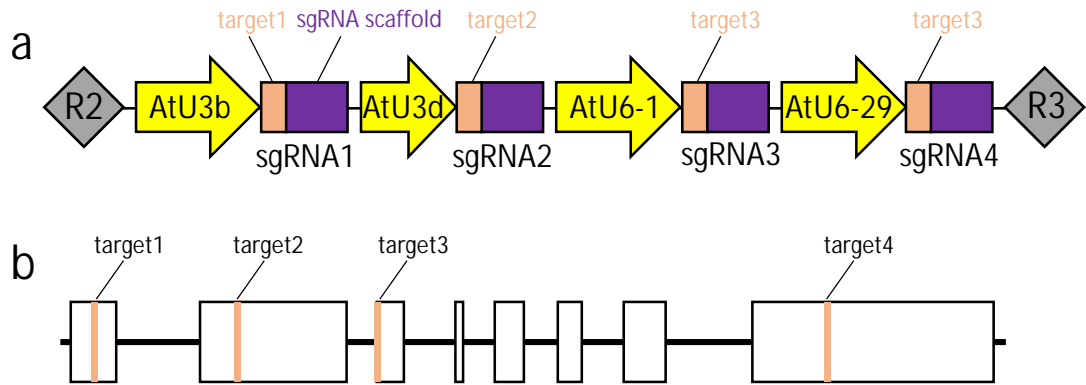

Supplementary Figure 1 IGE construct targeting *PLT2*.

(a) Tandem arrayed sgRNA expression cassettes. (b) The genomic structure of *PLT2*. Boxes indicate exons. Orange bars represent targets in *PLT2*.

Supplementary Figure 2

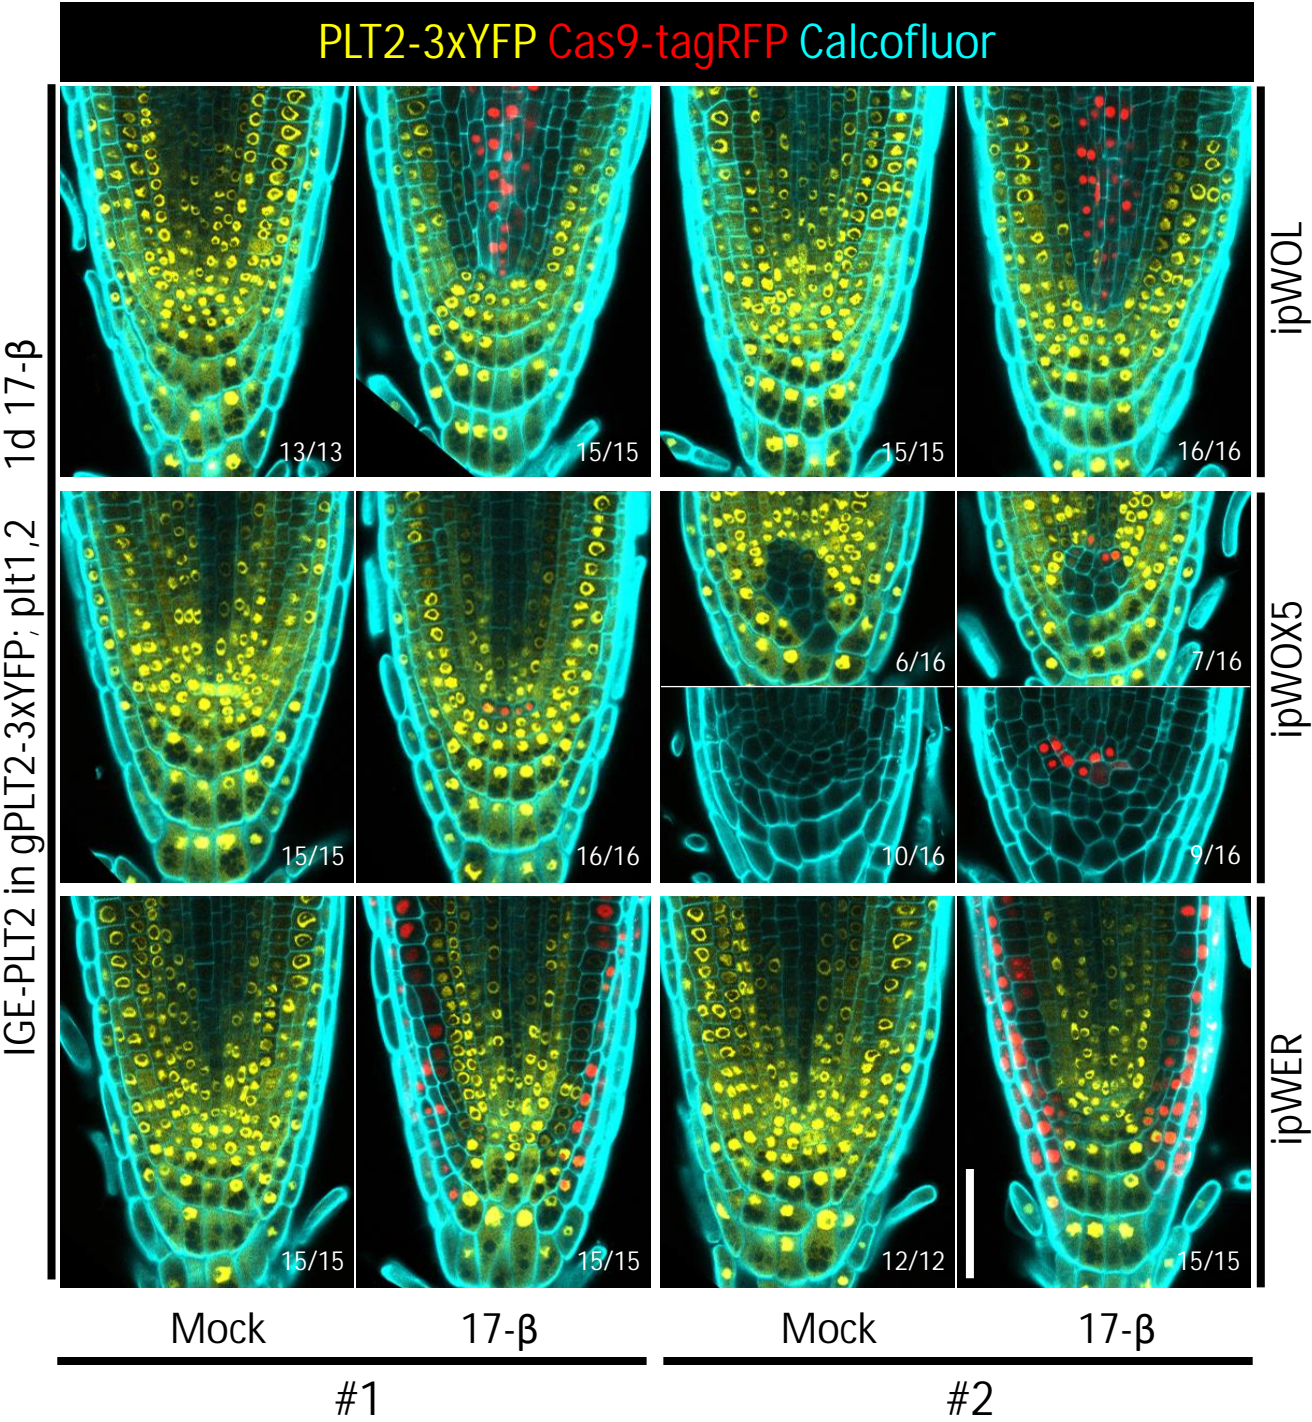

Supplementary Figure 2 IGE system-driven genome editing capability is inherited.

For each construct, two independent transgenic T2 lines were randomly selected and analyzed. Representative images are shown. Note that the second *ipWOX5*>>*Cas9p-tagRFP-PLT2* line was leaky: roots displayed a similar phenotype with/without induction. Cell walls are marked by calcofluor. Numbers represent the frequency of the observed phenotype in analyzed T2 samples. All experiments were repeated three times. Scale bar, 50 μm.



Supplementary Figure 3

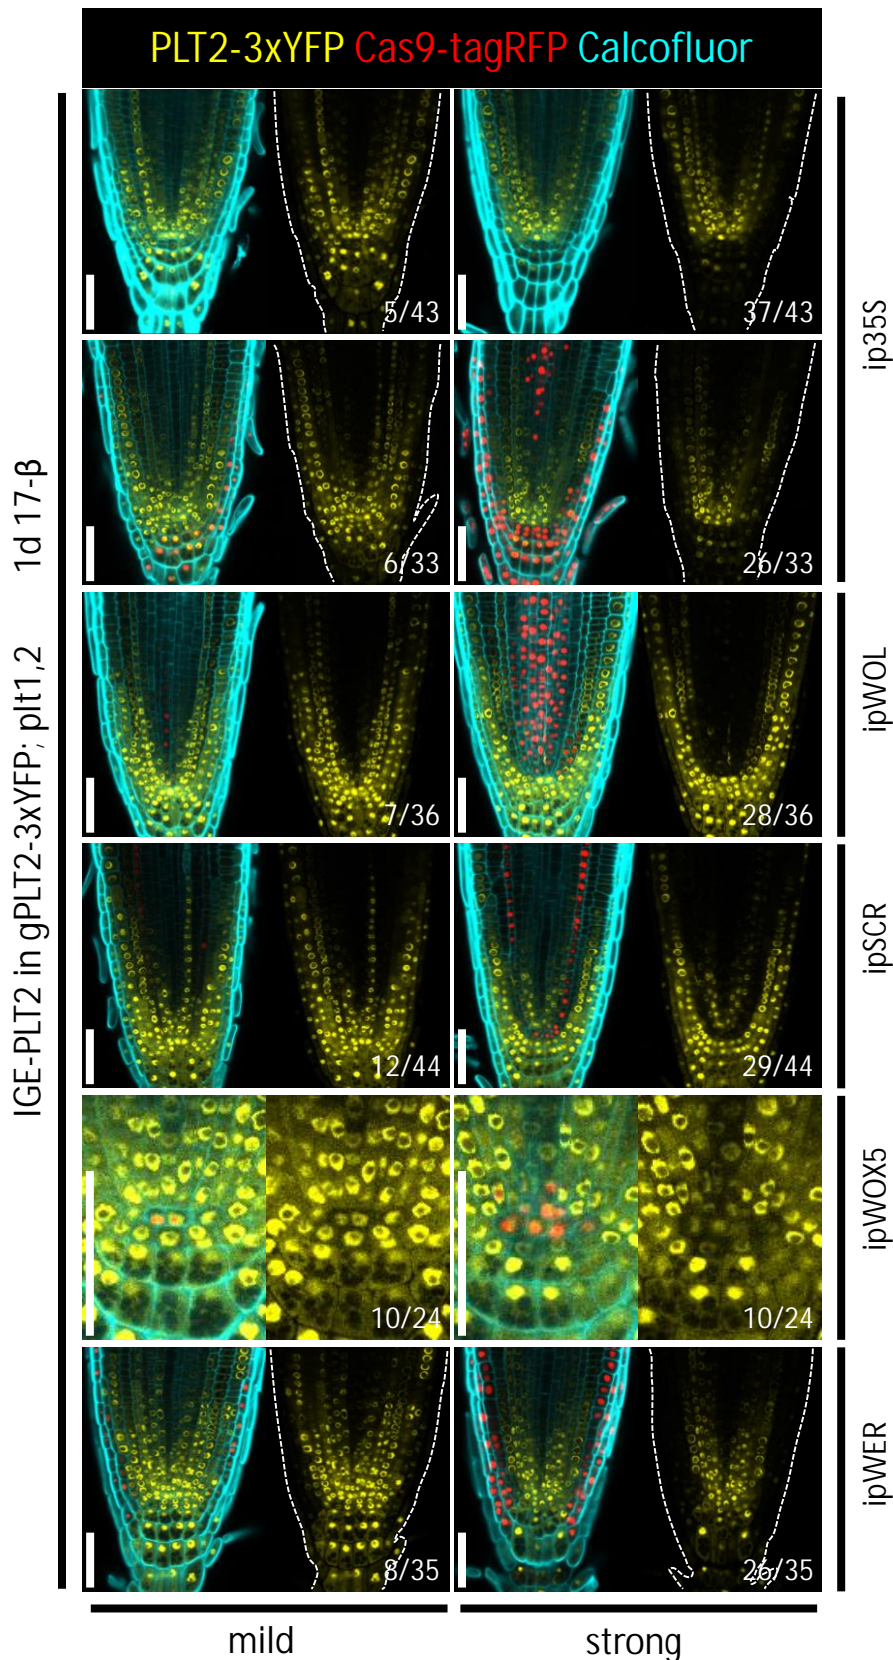

Supplementary Figure 3 IGE-mediated genome editing correlates with Cas9 expression.

After one day of induction, IGE performance on *PLT2* editing under different inducible promoters was classified into two categories. In the mild category, Cas9p/Cas9p-tagRFP expression tends to be weak and narrow, resulting in narrow domains of moderately decreased YFP signal. In the strong category, Cas9p-tagRFP expression was strong and broad, with strongly and broadly reduced YFP fluorescence. In the uppermost panel, Cas9p was used without a tag. White dotted lines mark the RM outlines. Cell walls are visualized by calcofluor. Numbers indicate the frequency of similar results in the T1 samples analyzed. All experiments were repeated at least three times. Scale bars, 50 μm.



Supplementary Figure 4

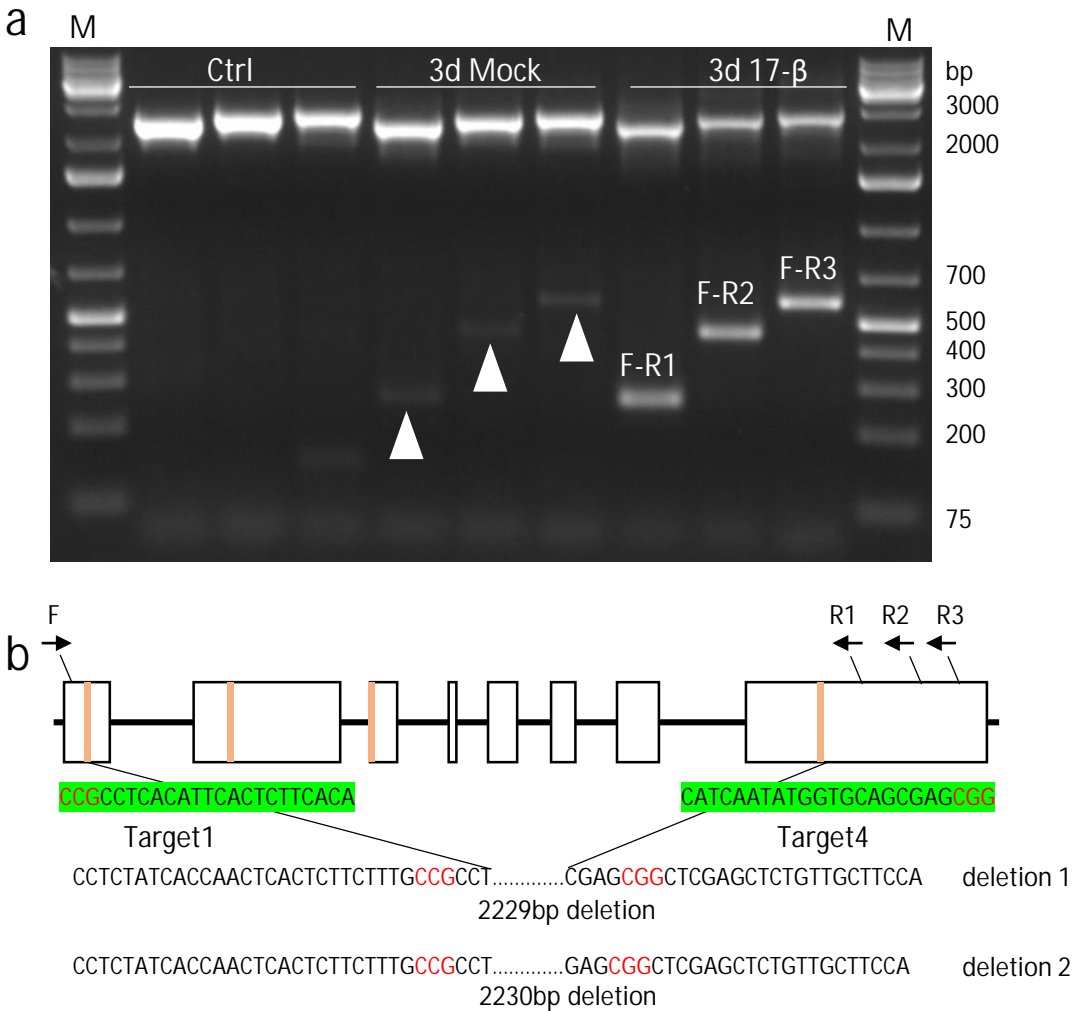

Supplementary Figure 4 PCR detection of IGE-mediated genome deletion.

(a) PCR detection of *PLT2* deletion in *ip35S>>Cas9p-PLT2* in *gPLT2-3xYFP; plt1,2* T1 seedlings after 3 days of treatment (in 6 day-old plants). Pooled DNA was isolated from 2cm root segments below the hypocotyl of 10 seedlings. Three primer pairs were used. There were no detectable truncated bands in 7-day old *gPLT2 3xYFP; plt1,2* (Ctrl), while weak truncated bands were detected in mock treated seedlings (white arrowhead), probably due to weak leakiness of *ip35S* in certain roots or cells. Note that although four sgRNAs were used to target *PLT2*, only one predominant truncated band was detected with each primer pair, corresponding to deletion between target1 and target4. Experiments were repeated three times. (b) Sequencing of truncated bands from primer pair F-R3 confirmed this deletion (letters in red represent protospacer adjacent motif, PAM). To determine the deletion types, the truncated band was not directly used for sequencing but cloned into *pDONR 221*. Two deletion types were found in 4 sequenced recombinant vectors. Black arrows represent relative positions of the forward and reverse primers.

Supplementary Figure 5

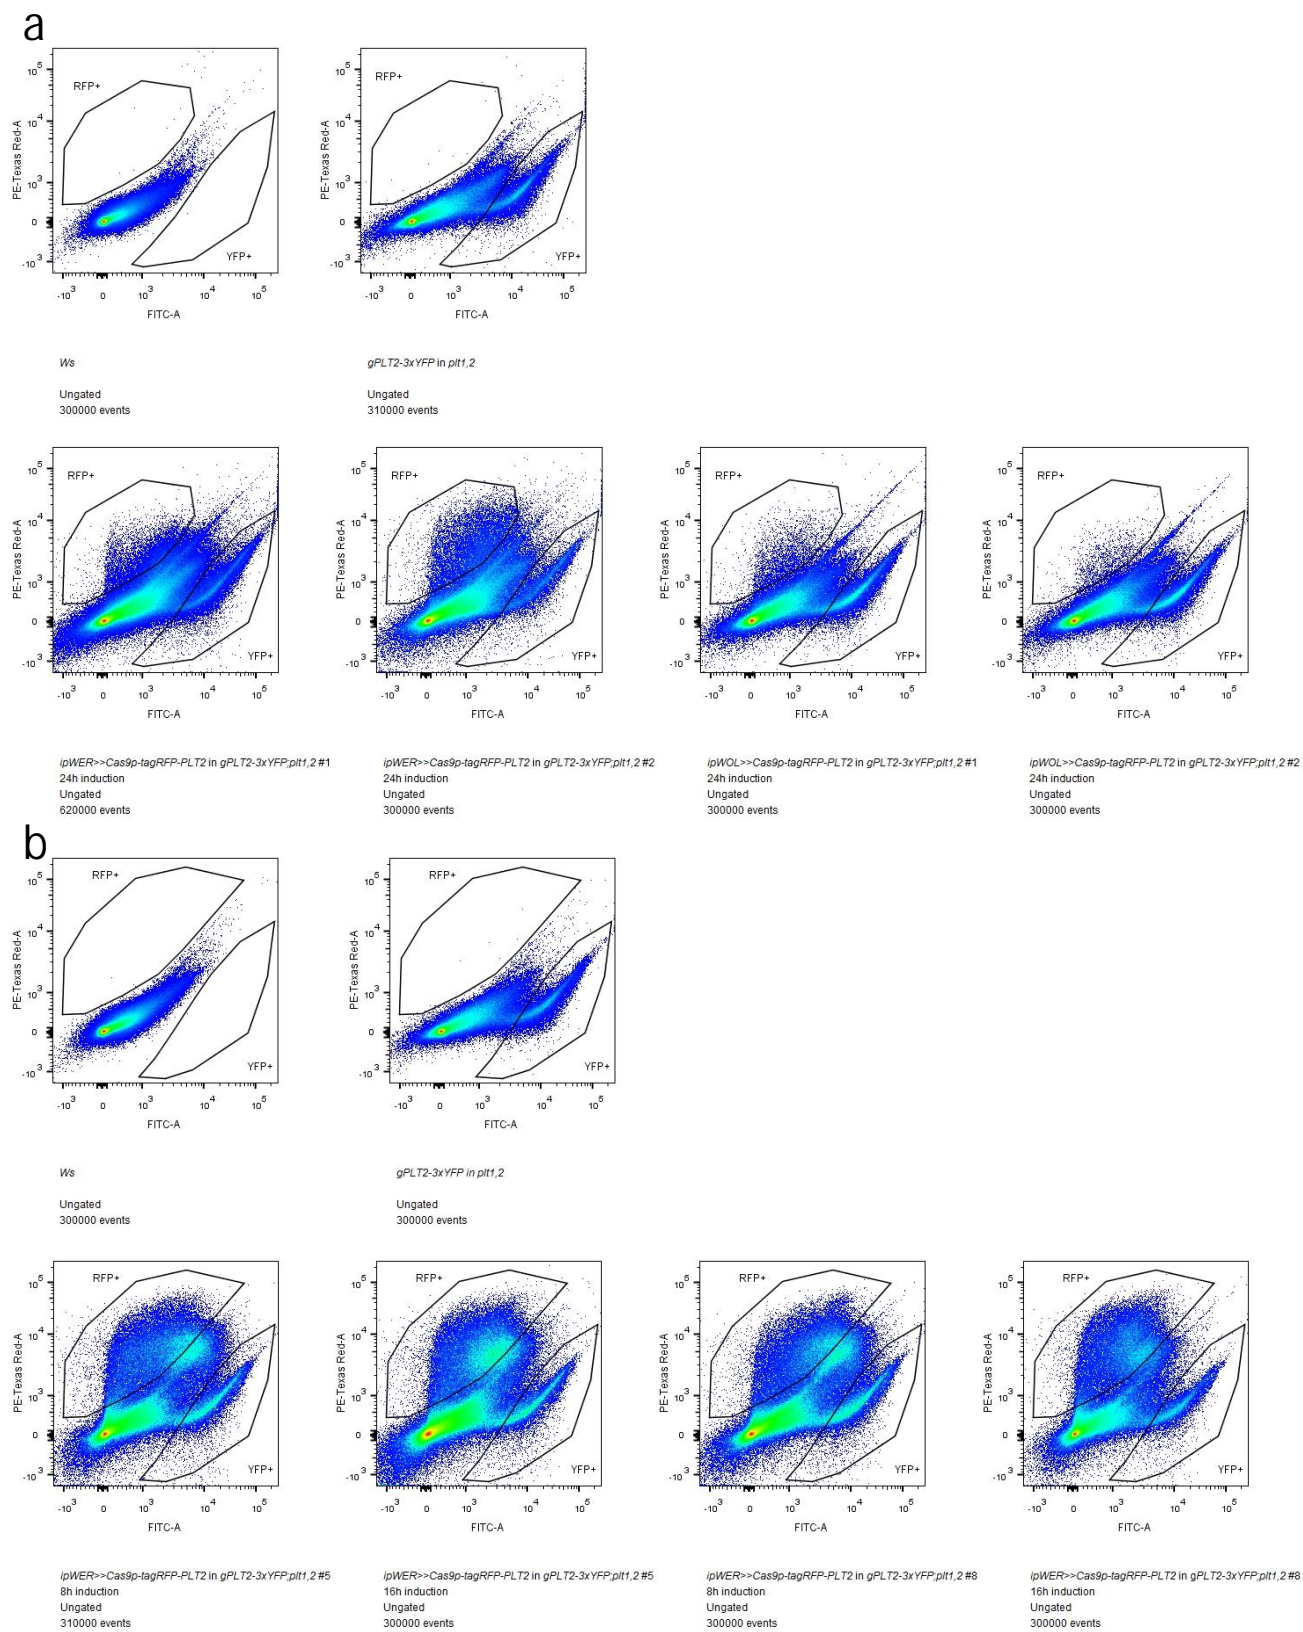

Supplementary Figure 5 Fluorescence-activated cell sorting of protoplasts obtained from IGE lines.

(a) FACS of protoplasts from T2 lines of *ipWER>>Cas9p-tagRFP-PLT2 in gPLT2-3xYFP; plt1,2* and *ipWOL>>Cas9p-tagRFP-PLT2 in gPLT2-3xYFP; plt1,2* after 24h induction. (b) FACS of protoplasts from time-course 17- $\beta$  induced T2 lines of *ipWER>>Cas9p-tagRFP-PLT2 in gPLT2-3xYFP; plt1,2*. Two independent transgenic lines of each construct were used for sorting. Each sample was sorted once.

# Supplementary Figure 6

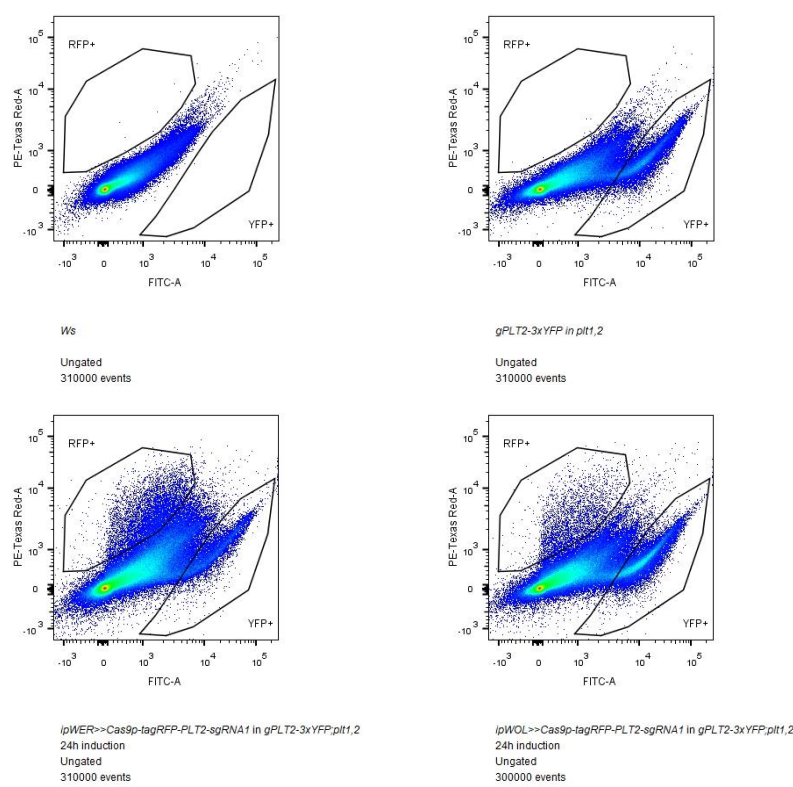

**Supplementary Figure 6 Fluorescence-activated cell sorting of protoplasts obtained from IGE transformants containing one sgRNA.**

FACS of protoplasts obtained from primary transformants (T1 generation) of *ipWER>>Cas9p-tagRFP-PLT2-sgRNA1* in *gPLT2-3xYFP; plt1,2* and *ipWOL>>Cas9p-tagRFP-PLT2-sgRNA1* in *gPLT2-3xYFP; plt1,2* after 24h induction. Sorting was performed once for each pooled T1 root material.

**Supplementary Table 1 Quantification of fully differentiated root meristem (RM) after 10 days induction**

| 1st BOX      | 2nd BOX                 | 3rd BOX                                                           | Differentiated RM after 10d 17-β induction. Two repeats |                |
|--------------|-------------------------|-------------------------------------------------------------------|---------------------------------------------------------|----------------|
| p1R4-35S:XVE | p221z-Cas9p-T35S        | p2R3z-PLT2-AtU3b-sgRNA1                                           | 31/47 (66.0 %)                                          | 25/41 (61.0 %) |
|              |                         | p2R3z-PLT2-AtU3d-sgRNA1                                           | 17/32 (53,1 %)                                          | 20/48 (41,7 %) |
|              |                         | p2R3z-PLT2-AtU6-1-sgRNA1                                          | 0/29 (0.0 %)                                            | 0/43 (0.0 %)   |
|              |                         | p2R3z-PLT2-AtU6-29-sgRNA1                                         | 15/23 (65.2 %)                                          | 22/34 (64.7 %) |
|              |                         | p2R3z-PLT2-AtU3b-tRNA-sgRNA1                                      | 20/34 (58.8 %)                                          | 25/31 (80.6 %) |
|              |                         | p2R3z-PLT2-AtU3b-sgRNA1+AtU3d-sgRNA2+AtU6-1-sgRNA3+AtU6-29-sgRNA4 | 17/32 (53.1 %)                                          | 25/35 (71.4 %) |
|              | p221z-Cas9p-taqRFP-T35S | p2R3z-PLT2-AtU3b-sgRNA1                                           | 21/32 (65.6 %)                                          | 23/39 (59.0 %) |
|              | p221z-dCas9p-T35S       | p2R3z-PLT2-AtU3b-sgRNA1+AtU3d-sgRNA2+AtU6-1-sgRNA3+AtU6-29-sgRNA4 | 0/32 (0.0 %)                                            | 0/41 (0.0 %)   |
|              | p221z-AtMIR390-PLT2-1   | p2R3z-nosT2                                                       | 0/29 (0.0 %)                                            | 0/32 (0.0 %)   |
|              | p221z-AtMIR390-PLT2-2   | p2R3z-nosT2                                                       | 0/24 (0.0 %)                                            | 0/37 (0.0 %)   |

**Supplementary Table 2 Primer used in this study**

| Primer name         | sequence(5'-3')                                                                 | purpose                                                                                                      |
|---------------------|---------------------------------------------------------------------------------|--------------------------------------------------------------------------------------------------------------|
| attB1-Cas9p-T35s-F  | GGGGACAAGTTTGTACAAAAAAGCAGGCTCGATGGCTCCT<br>AAGAAGAAGCG                         | For cloning Cas9p with<br>T35s terminator into<br>2nd BOX                                                    |
| attB2-Cas9p-T35s-R  | GGGGACCACTTTGTACAAGAAAGCTGGGTGGTCACTGGA<br>TTTTGGTTTAGG                         |                                                                                                              |
| attB2-ccdB-F        | GGGGACAGCTTCTTGTACAAAGTGGAACTCGAGAGACCT<br>CTGAAGTGG                            | For cloning Bsa I-ccdB-<br>Bsa I into 3 box                                                                  |
| attB3-ccdB-R        | GGGGACAACCTTTGTATAATAAAGTTGAACCGCGAGACCCA<br>CGCTCAC                            |                                                                                                              |
| PLT2-TG1-gRT#+      | TGTGAAGAGTGAATGTGAGGTTTTAGAGCTAGAAAT                                            | For cloning 4 sgRNA<br>expression cassettes<br>targeting PLT2                                                |
| PLT2-TG1-AtU3bT#-   | CCTCACATTCACCTTTCACATGACCAATGTTGCTCC                                            |                                                                                                              |
| PLT2-TG2-gRT#+      | ATAAGGTACGAGGTTGTGATTTTTAGAGCTAGAAAT                                            |                                                                                                              |
| PLT2-TG2-AtU3dT#-   | ATCACAACCTCGTACCTTATTGACCAATGGTGCTTTG                                           |                                                                                                              |
| PLT2-TG3-gRT#+      | TTAGATAACTAACTACGAGAGTTTTAGAGCTAGAAAT                                           |                                                                                                              |
| PLT2-TG3-AtU6-1T#-  | TCTCGTAGTTAGTTATCTAACAATCACTACTTCGTCT                                           |                                                                                                              |
| PLT2-TG4-gRT#+      | CATCAATATGGTGCAGCGAGTTTTAGAGCTAGAAAT                                            |                                                                                                              |
| PLT2-TG4-AtU6-29T#- | CTCGCTGCACCATATTGATGCAATCTCTTAGTCGACT                                           |                                                                                                              |
| dCas9p-D10A-F       | TACTCCATCGGCCTCgcgATCGGCACCAACAGC                                               | dCas9 cloning                                                                                                |
| dCas9p-H840A-R      | GACTGAGGAACAATcgcGTCGACGTCGTAGT                                                 |                                                                                                              |
| attB1-gPLT2-F       | GGGGACAAGTTTGTACAAAAAAGCAGGCTCGATGAATTCT<br>AACAACCTGGCTC                       | PCR detection of PLT2<br>deletion from genome,<br>and subsequent cloning<br>into pDONR221z for<br>sequencing |
| attB2-gPLT2-R1      | GGGGACCACTTTGTACAAGAAAGCTGGGTGGAATCATGA<br>TACTGAGAGAT                          |                                                                                                              |
| attB2-gPLT2-R2      | GGGGACCACTTTGTACAAGAAAGCTGGGTGGAGCTTGAC<br>CCAATACCAAT                          |                                                                                                              |
| attB2-gPLT2-R3      | GGGGACCACTTTGTACAAGAAAGCTGGGTGGATCCTTGA<br>GCAGACTCTCC                          |                                                                                                              |
| amiPLT2-1-F         | TGTATGATGATCCCCGATTTGCTGATGATGATCACATTG<br>TTATCTATTTTTTCAGCAAATCGTGGGATCATCA   | amiPLT2-1 cloning                                                                                            |
| amiPLT2-1-R         | AATGTGATGATCCACGATTTGCTGAAAAAATAGATAACG<br>AATGTGATCATCATCAGCAAATCGGGGGATCATCA  |                                                                                                              |
| amiPLT2-2-F         | TGTATGATCGGTGTGATGATCCCCGATGATGATCACATTC<br>GTTATCTATTTTTTCGGGGATCATAACACCGATCA | amiPLT2-2 cloning                                                                                            |
| amiPLT2-2-R         | AATGTGATCGGTGTTATGATCCCCGAAAAAATAGATAACG<br>AATGTGATCATCATCGGGGATCATCACACCGATCA |                                                                                                              |
| PLT2-TG1-AtU3dT#-   | CCTCACATTCACCTTTCACATGACCAATGGTGCTTTG                                           | sgRNA promoter<br>comparison                                                                                 |
| PLT2-TG1-AtU6-1T#-  | CCTCACATTCACCTTTCACACAATCACTACTTCGTCT                                           |                                                                                                              |
| PLT2-TG1-AtU6-29T#- | CCTCACATTCACCTTTCACACAATCTCTTAGTCGACT                                           |                                                                                                              |
| YFP-gRT             | CCCATCTGGTCGAGCTGGA                                                             | YFP targeting                                                                                                |
| AtU3b-YFP           | TCCAGCTCGACCAGGATGGGTGACCAATGTTGCTCC                                            |                                                                                                              |
| RBR-TG1-gRT#+       | TCAGCAAGCATGTCTAACATGTTTTAGAGCTAGAAAT                                           | For cloning 4 sgRNA<br>expression cassettes<br>targeting RBR                                                 |
| RBR-TG1-AtU3bT#     | ATGTTAGACATGCTTGCTGATGACCAATGTTGCTCC                                            |                                                                                                              |
| RBR-TG2-gRT#+       | GTC AAGGCTGGATCTGTACTGTTTTAGAGCTAGAAAT                                          |                                                                                                              |
| RBR-TG2-AtU3dT#     | AGTACAGATCCAGCCTTGACTGACCAATGGTGCTTTG                                           |                                                                                                              |
| RBR-TG3-gRT#+       | TATCCTCAACTCATCTTCTGTTTTAGAGCTAGAAAT                                            |                                                                                                              |
| RBR-TG3-AtU6-1T#    | CAGAAGATGAGTTGAGGATACAATCACTACTTCGTCT                                           |                                                                                                              |
| RBR-TG4-gRT#+       | TATGACAGTCTGAGCCACTGTTTTAGAGCTAGAAAT                                            |                                                                                                              |
| RBR-TG4-AtU6-29T#   | AGTGGCTCAGGACTGTCATACAATCTCTTAGTCGACT                                           |                                                                                                              |
| GNOM-TG1-gRT#+      | ACTACACTTGTCAACAGAGCGTTTTAGAGCTAGAAAT                                           | For cloning 4 sgRNA<br>expression cassettes<br>targeting GNOM                                                |
| GNOM-TG1-AtU3bT#    | GCTCTGTTGACAAAGTGATTTGACCAATGTTGCTCC                                            |                                                                                                              |
| GNOM-TG2-gRT#+      | TTGATGGATGATGGACCACTGTTTTAGAGCTAGAAAT                                           |                                                                                                              |
| GNOM-TG2-AtU3dT#    | ACTGGTCCATCATCCATCAATGACCAATGGTGCTTTG                                           |                                                                                                              |
| GNOM-TG3-gRT#+      | GTGTA CT CATCAAGATGGACGTTTTAGAGCTAGAAAT                                         |                                                                                                              |
| GNOM-TG3-AtU6-1T#   | GTCCATCTTGATGAGTACACCAATCACTACTTCGTCT                                           |                                                                                                              |
| GNOM-TG4-gRT#+      | TCAGCTCATCTACAGTCAATGTTTTAGAGCTAGAAAT                                           |                                                                                                              |
| GNOM-TG4-AtU6-29T#  | ATTGACTGTAGATGAGCTGACAATCTCTTAGTCGACT                                           |                                                                                                              |

|                  |                                                                                         |                                                                                   |
|------------------|-----------------------------------------------------------------------------------------|-----------------------------------------------------------------------------------|
| attB2-AtU3b-F    | <u>GGGGACAGCTTTCTTGACAAAGT</u> <u>GGAATTTACTTTAAATT</u><br><u>TTTTCTTAT</u>             | Generating p2R3z-<br>AtU3b-tRNA-ccdB-gRNA<br>entry clone                          |
| tRNA-AtU3b-R     | ACCACTAGACCACTGGTGCTTTGTTTGACCAATGTTGCTCC<br>CTCAGTGTT                                  |                                                                                   |
| AtU3b-tRNA-F     | TAACACTGAGGGAGCAACATTGGTCAAACAAAGCACCAGT<br>GGTCTA                                      |                                                                                   |
| tRNA-R           | CCGTGGCAGGGTACTATTCTACCACTAGACCACTGGTGCT<br>TTGTT                                       |                                                                                   |
| tRNA-F           | AGAATAGTACCCTGCCACGGTACAGACCCGGGTTTCGATT<br>CCGGCT                                      |                                                                                   |
| ccdB-tRNA-R      | TGAATCGGCCACTTCAGAGGTCTCTTGCAACAGCCGGGAA<br>TCGAACCCGGG                                 |                                                                                   |
| tRNA-ccdB-F      | CCCGGGTTCGATTCCCGGCTGGTGCAAGAGACCTCTGAAG<br>TGGCCGATTCA                                 |                                                                                   |
| ccdB-sgRNA-R     | AAC TTGCTATTTCTAGCTCTAAAACCGAGACCCACGCTCAC<br>CCGCCGCGC                                 |                                                                                   |
| ccdB-sgRNA-F     | GCGCGGCGGGTGAGCGTGGGTCTCGGTTTTAGAGCTAGA<br>AATAGCAAGTT                                  |                                                                                   |
| attB3-sgRNA-R    | <u>GGGGACAAC</u> <u>TTTGTATAATAAAGTT</u> <u>GAAAAAAAAAAGCAC</u><br><u>CGACTCGGTGCCA</u> |                                                                                   |
| BSAI-PLT2-TG1-F  | TGCA <u>TGTGAAGAGTGAATGTGAGG</u>                                                        | For cloning PLT2 target<br>1 into 2R3z-AtU3b-<br>tRNA-ccdB-gRNA entry<br>clone    |
| BSAI-PLT2-TG1-R  | AAACCCTCACATTCACCTCTTCACA                                                               |                                                                                   |
| Cas9-RFP-F       | CGTATCGACCTTTCCAGCTTGGTGGTGATATGAGCGAGC<br>TGATTAAGGA                                   | For making p221z-<br>Cas9p-tagRFP entry<br>clone                                  |
| NLS-RFP-R        | TCCGGCCTTTTGGTGGCAGCAGGACGCTTCTTG TCCCC<br>AGTTTGCTAG                                   |                                                                                   |
| PLT2-TG1-F1      | GCTTTGATTCCAAGAAAAGGG                                                                   | TIDE analysis or<br>amplicon sequencing                                           |
| PLT2-TIDE-TG1-R1 | CATGTGCAATGATGCTTTTCGA                                                                  |                                                                                   |
| PLT2-TIDE-TG1-R2 | GTGGATTGATCATATTCCATC                                                                   |                                                                                   |
| PLT2-TIDE-TG2-F  | GATGGAATATGATCAATCCAC                                                                   |                                                                                   |
| PLT2-TIDE-TG2-R  | CTACCGGTCCATCTATGTCT                                                                    |                                                                                   |
| PLT2-TIDE-TG3-F  | GTGGGTATGACAAAGAAGAG                                                                    |                                                                                   |
| PLT2-TIDE-TG3-R  | CTTACTGAATGTTCCAAGTAG                                                                   |                                                                                   |
| PLT2-TIDE-TG4-F  | GCACGGAGGAAGAAGCAGCAG                                                                   |                                                                                   |
| PLT2-TIDE-TG4-R  | GAGCTTGACCCAATACCAAT                                                                    | Amplicon sequencing<br>Quantification of<br>genome deletion of<br>transgenic PLT2 |
| PLT2-TG1-F2      | ATGAATTCTAACAACCTGGCTCG                                                                 |                                                                                   |
| PLT2-TG1-R       | ATGTCTTAATATTTGAACCTTCG                                                                 |                                                                                   |
| PLT2-qPCR-F      | TGTACAAAAAAGCAGGCTTCATG                                                                 |                                                                                   |
| PLT2-qPCR-R      | GTTGACCAAACCTAGATTGAAATG                                                                |                                                                                   |

Underlined sequences indicate Gateway adaptors. Sequence in red represent the target sequence in the gene.



**Supplementary Table 3 Constructs generated in this study**

| Expression vector name                  | 1st BOX        | 2nd BOX                 | 3rd BOX                                                           | Destination vector |
|-----------------------------------------|----------------|-------------------------|-------------------------------------------------------------------|--------------------|
| 35S:XVE>>Cas9p-PLT2-AtU3b-sgRNA1        | p1R4-35S:XVE   | p221z-Cas9p-T35S        | p2R3z-PLT2-AtU3b-sgRNA1                                           | pBm43GW            |
| 35S:XVE>>Cas9p-PLT2-AtU3d-sgRNA1        | p1R4-35S:XVE   | p221z-Cas9p-T35S        | p2R3z-PLT2-AtU3d-sgRNA1                                           | pBm43GW            |
| 35S:XVE>>Cas9p-PLT2-AtU6-1-sgRNA1       | p1R4-35S:XVE   | p221z-Cas9p-T35S        | p2R3z-PLT2-AtU6-1-sgRNA1                                          | pBm43GW            |
| 35S:XVE>>Cas9p-PLT2-AtU6-29-sgRNA1      | p1R4-35S:XVE   | p221z-Cas9p-T35S        | p2R3z-PLT2-AtU6-29-sgRNA1                                         | pBm43GW            |
| 35S:XVE>>Cas9p-PLT2-AtU3b-tRNA-sgRNA1   | p1R4-35S:XVE   | p221z-Cas9p-T35S        | p2R3z-PLT2-AtU3b-tRNA-sgRNA1                                      | pFRm43GW           |
| 35S:XVE>>Cas9p-PLT2-sgRNA1-4            | p1R4-35S:XVE   | p221z-Cas9p-T35S        | p2R3z-PLT2-AtU3b-sgRNA1+AtU3d-sgRNA2+AtU6-1-sgRNA3+AtU6-29-sgRNA4 | pBm43GW            |
| 35S:XVE>>dCas9p-PLT2-sgRNA1-4           | p1R4-35S:XVE   | p221z-dCas9p-T35S       | p2R3z-PLT2-AtU3b-sgRNA1+AtU3d-sgRNA2+AtU6-1-sgRNA3+AtU6-29-sgRNA4 | pBm43GW            |
| 35S:XVE>>Cas9p-tagRFP-PLT2-AtU3b-sgRNA1 | p1R4-35S:XVE   | p221z-Cas9p-tagRFP-T35S | p2R3z-PLT2-AtU3b-sgRNA1                                           | pBm43GW            |
| 35S:XVE>>AtMIR390-PLT2-1-nosT2          | p1R4-35S:XVE   | p221z-AtMIR390-PLT2-1   | nosT2                                                             | pFRm43GW           |
| 35S:XVE>>AtMIR390-PLT2-2-nosT2          | p1R4-35S:XVE   | p221z-AtMIR390-PLT2-2   | nosT2                                                             | pFRm43GW           |
| pWOX5:XVE>>AtMIR390-PLT2-1-nosT2        | p1R4-pWOX5:XVE | p221z-AtMIR390-PLT2-1   | nosT2                                                             | pFRm43GW           |
| pWER:XVE>>Cas9p-tagRFP-PLT2-sgRNA1-4    | p1R4-pWER:XVE  | p221z-Cas9p-tagRFP-T35S | p2R3z-PLT2-AtU3b-sgRNA1+AtU3d-sgRNA2+AtU6-1-sgRNA3+AtU6-29-sgRNA4 | pBm43GW            |
| pWOX5:XVE>>Cas9p-tagRFP-PLT2-sgRNA1-4   | p1R4-pWOX5:XVE | p221z-Cas9p-tagRFP-T35S | p2R3z-PLT2-AtU3b-sgRNA1+AtU3d-sgRNA2+AtU6-1-sgRNA3+AtU6-29-sgRNA4 | pBm43GW            |
| pSCR:XVE>>Cas9p-tagRFP-PLT2-sgRNA1-4    | p1R4-pSCR:XVE  | p221z-Cas9p-tagRFP-T35S | p2R3z-PLT2-AtU3b-sgRNA1+AtU3d-sgRNA2+AtU6-1-sgRNA3+AtU6-29-sgRNA4 | pBm43GW            |
| pWOL:XVE>>Cas9p-tagRFP-PLT2-sgRNA1-4    | p1R4-pWOL:XVE  | p221z-Cas9p-tagRFP-T35S | p2R3z-PLT2-AtU3b-sgRNA1+AtU3d-sgRNA2+AtU6-1-sgRNA3+AtU6-29-sgRNA4 | pBm43GW            |
| pWER:XVE>>Cas9p-taRFP-RBR-sRNA1-4       | p1R4-pWER:XVE  | p221z-Cas9p-tagRFP-T35S | p2R3z-RBR-AtU3b-sgRNA1+AtU3d-sgRNA2+AtU6-1-sgRNA3+AtU6-29-sgRNA4  | pFRm43GW           |
| pWOX5:XVE>>Cas9p-taRFP-RBR-sRNA1-4      | p1R4-pWOX5:XVE | p221z-Cas9p-tagRFP-T35S | p2R3z-RBR-AtU3b-sgRNA1+AtU3d-sgRNA2+AtU6-1-sgRNA3+AtU6-29-sgRNA4  | pFRm43GW           |
| pSCR:XVE>>Cas9p-taRFP-RBR-sRNA1-4       | p1R4-pSCR:XVE  | p221z-Cas9p-tagRFP-T35S | p2R3z-RBR-AtU3b-sgRNA1+AtU3d-sgRNA2+AtU6-1-sgRNA3+AtU6-29-sgRNA4  | pFRm43GW           |
| pWOL:XVE>>Cas9p-taRFP-RBR-sRNA1-4       | p1R4-pWOL:XVE  | p221z-Cas9p-tagRFP-T35S | p2R3z-RBR-AtU3b-sgRNA1+AtU3d-sgRNA2+AtU6-1-sgRNA3+AtU6-29-sgRNA4  | pFRm43GW           |
| 35S:XVE>>Cas9p-RBR-sgRNA1-4             | p1R4-35S:XVE   | p221z-Cas9p-T35S        | p2R3z-RBR-AtU3b-sgRNA1+AtU3d-sgRNA2+AtU6-1-sgRNA3+AtU6-29-sgRNA4  | pFRm43GW           |
| pWER:XVE>>Cas9p-tagRFP-AtU3b-YFP-sgRNA  | p1R4-pWER:XVE  | p221z-Cas9p-tagRFP-T35S | 2R3z-YFP-AtU3b-sgRNA                                              | pFRm43GW           |
| pWOX5:XVE>>Cas9p-tagRFP-AtU3b-YFP-sgRNA | p1R4-pWOX5:XVE | p221z-Cas9p-tagRFP-T35S | 2R3z-YFP-AtU3b-sgRNA                                              | pFRm43GW           |
| pWOL:XVE>>Cas9p-tagRFP-GNOM-sgRNA1-4    | p1R4-pWOL:XVE  | p221z-Cas9p-tagRFP-T35S | p2R3z-GNOM-AtU3b-sgRNA1+AtU3d-sgRNA2+AtU6-1-sgRNA3+AtU6-29-sgRNA4 | pFRm43GW           |

| Expression vector name             | 1st BOX       | 2nd BOX                 | 3rd BOX                 | Destination vector |
|------------------------------------|---------------|-------------------------|-------------------------|--------------------|
| pWER:XVE>>Cas9p-tagRFP-PLT2-sgRNA1 | p1R4-pWER:XVE | p221z-Cas9p-tagRFP-T35S | p2R3z-PLT2-AtU3b-sgRNA1 | pFRm43GW           |
| pWOL:XVE>>Cas9p-tagRFP-PLT2-sgRNA1 | p1R4-pWOL:XVE | p221z-Cas9p-tagRFP-T35S | p2R3z-PLT2-AtU3b-sgRNA1 | pFRm43GW           |
